# Supplementary material for: Polyfluorenylacetylene for near-infrared laser protection: polymer synthesis, optical limiting mechanism and relationship between molecular structure and properties
Source: Royal Society of Chemistry journal article supplement (doi:10.1039/c7ra08499d), 2017-01-01
Supplement: c7ra08499d1.pdf [file c7ra08499d1.pdf]

Supplementary Information

**Polyfluorenylacetylene for near-infrared laser protection: polymer synthesis, optical limiting mechanism and relationship between molecular structure and properties**

Gang Zhao,<sup>a</sup> Yan Feng,<sup>b</sup> Shanyi Guang,<sup>c\*</sup> Hongyao Xu,<sup>\*a</sup> Naibo Lin<sup>a,d</sup>, [Xiangyang Liu<sup>d</sup>](#)

<sup>a</sup> College of Material Science and Engineering & State Key Laboratory for Modification of Chemical Fibers and Polymer Materials, Donghua University, Shanghai 201620, China.

<sup>b</sup> School of Chemistry and Chemical Engineering & The Key Laboratory of Environment-friendly Polymer Materials of Anhui Province, Anhui University, Hefei 230039, China.

<sup>c</sup> College of Chemistry and Bioengineering, Donghua University, Shanghai 201620, China.

<sup>d</sup> Department of Physics, and Department of Chemistry National University of Singapore 2 Science Drive 3, Singapore, 117542, Singapore.

\*Corresponding author: Professor Hongyao Xu, College of Material Science and Engineering & State Key Laboratory of Chemical Fibers and Polymeric Materials modification, Donghua University, Shanghai 201620, China. Tel: +86-21-67792874, E-mail: hongyaoyu@163.com

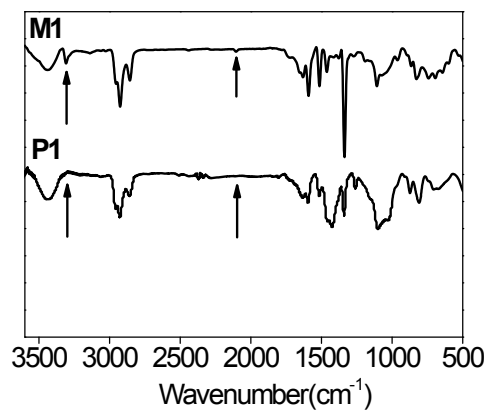

**Fig. S1.** FTIR spectra of **M1** and **P1**.

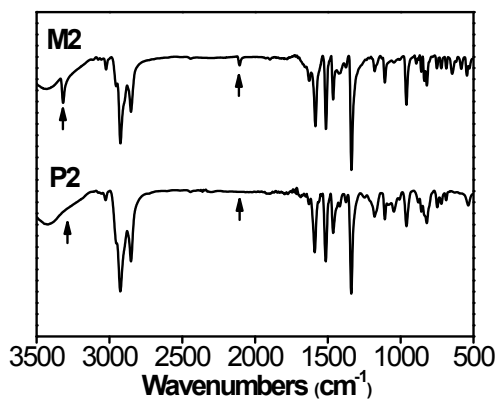

**Fig. S2.** FTIR spectra of **M2** and **P2**.

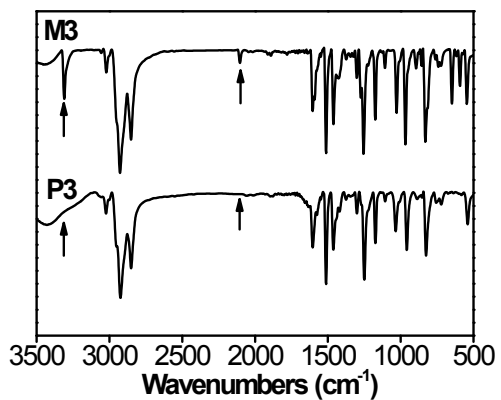

**Fig. S3.** FTIR spectra of **M3** and **P3**.

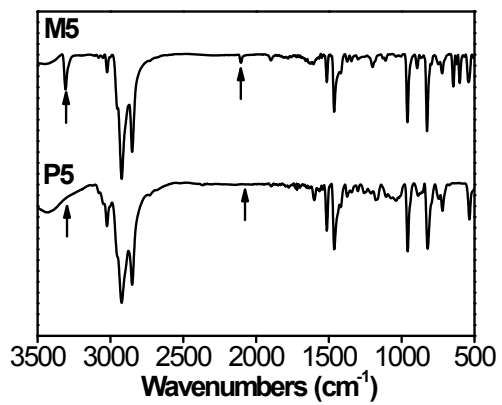

**Fig. S4.** FTIR spectra of **M5** and **P5**.

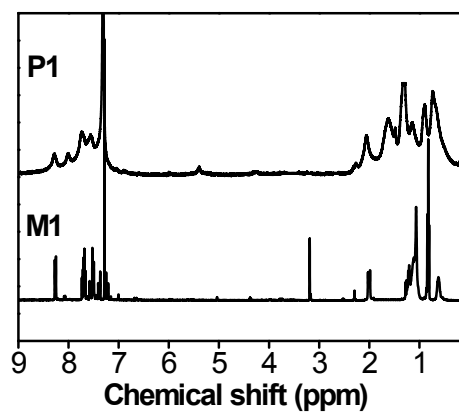

**Fig. S5.** <sup>1</sup>H NMR spectra of **M1** and **P1**.

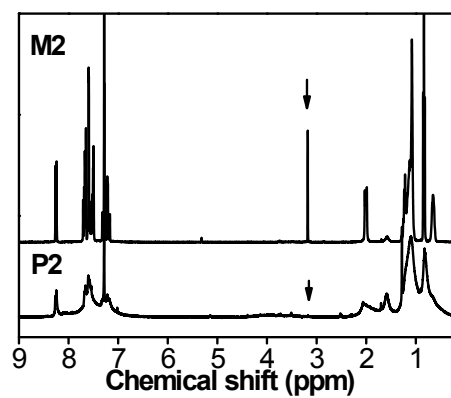

**Fig. S6.** <sup>1</sup>H NMR spectra of **M2** and **P2**.

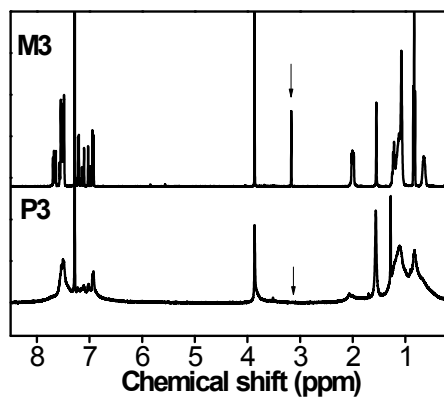

Fig. S7.  $^1\text{H}$  NMR spectra of M3 and P3.

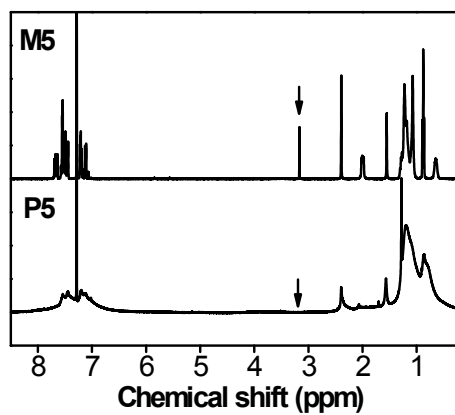

Fig. S8.  $^1\text{H}$  NMR spectra of M5 and P5.

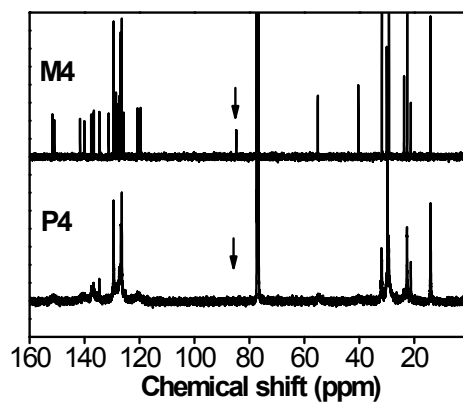

Fig. S9.  $^{13}\text{C}$  NMR spectra of M4 and P4.

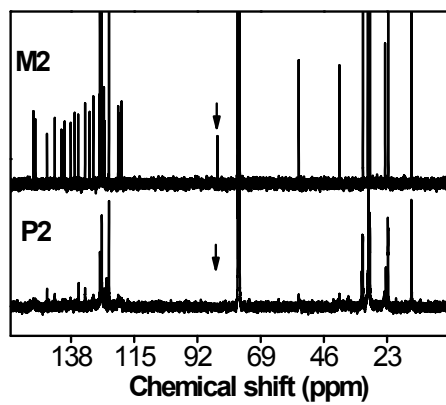

**Fig. S10.** <sup>13</sup>C NMR spectra of **M2** and **P2**.

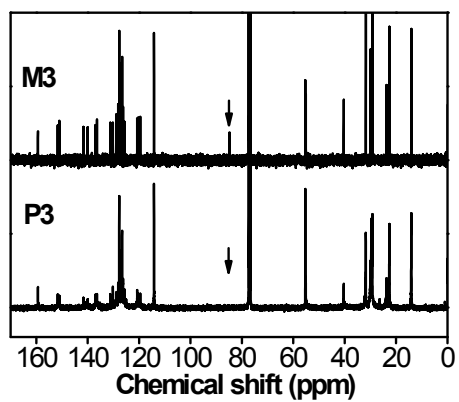

**Fig. S11.** <sup>13</sup>C NMR spectra of **M3** and **P3**.

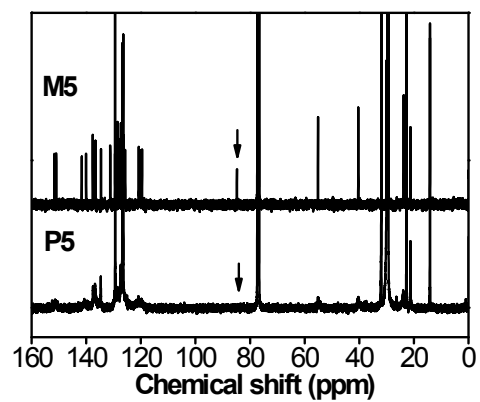

**Fig. S12.** <sup>13</sup>C NMR spectra of **M5** and **P5**.

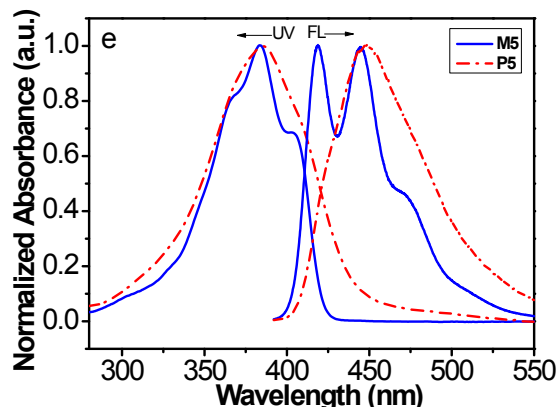

**Fig. S13.** Normalized UV-vis absorption and FL emission spectra of **M5** (solid line) and **P5** (dash dot) in THF solutions.

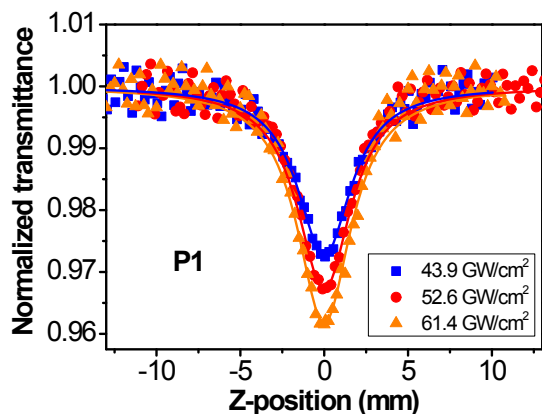

**Fig. S14.** Open-aperture Z-scans of **P1** at the different pulse energy in THF solution. Solid lines are the theoretical fit for two-photon absorption.

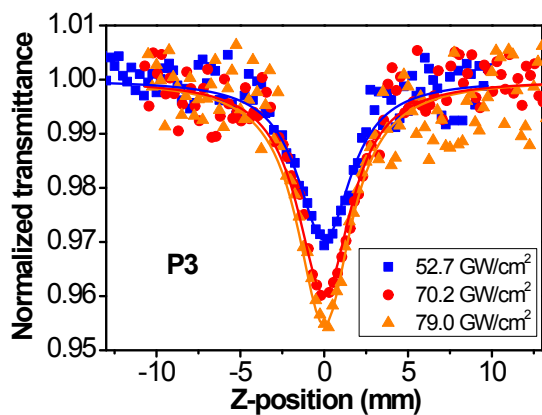

**Fig. S15.** Open-aperture Z-scans of **P3** at the different pulse energy in THF solution. Solid lines are the theoretical fit for two-photon absorption.

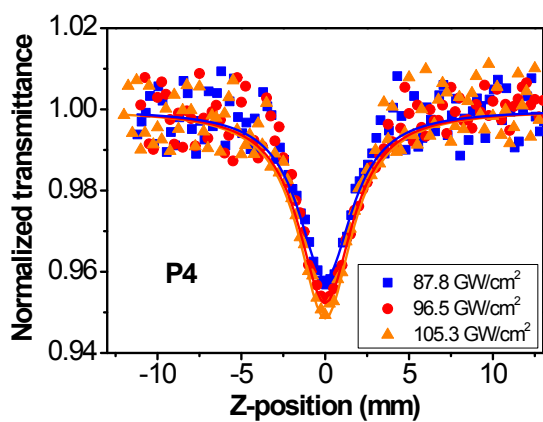

**Fig. S16.** Open-aperture Z-scans of **P4** at the different pulse energy in THF solution. Solid lines are the theoretical fit for two-photon absorption.

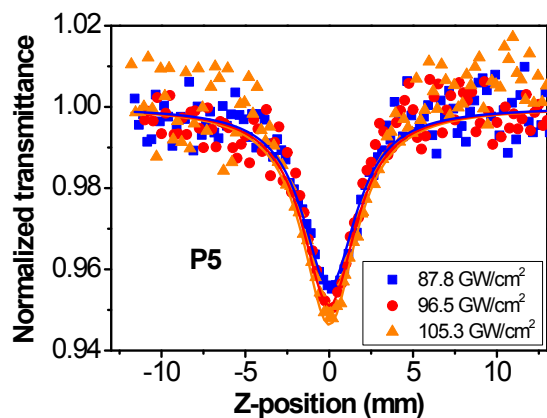

**Fig. S17.** Open-aperture Z-scans of **P5** at the different pulse energy in THF solution. Solid lines are the theoretical fit for two-photon absorption.

**Table 1S.** Optical Limiting and Two-photon Absorption Properties of **P1-P5**.

| Polymer   | <sup>a</sup> Limiting threshold (GW/cm <sup>2</sup> ) | TPA coefficient                                              | <sup>b</sup> TPA              |
|-----------|-------------------------------------------------------|--------------------------------------------------------------|-------------------------------|
|           |                                                       | $\beta$ (cm/GW) [irradiance intensity (GW/cm <sup>2</sup> )] | cross section $\sigma_2$ (GM) |
|           |                                                       | 0.01931 [43.9]                                               | 817.0                         |
| <b>P1</b> | 21.4                                                  | 0.01933 [52.6]                                               | 817.9                         |
|           |                                                       | 0.01934 [61.4]                                               | 818.3                         |
| <b>P2</b> | 16.7                                                  | 0.02109 [43.9]                                               | 892.4                         |
|           |                                                       | 0.02185 [52.6]                                               | 924.5                         |
|           |                                                       | 0.02161 [61.4]                                               | 914.4                         |
| <b>P3</b> | 26.5                                                  | 0.01751 [52.7]                                               | 740.9                         |
|           |                                                       | 0.01755 [70.2]                                               | 742.6                         |
|           |                                                       | 0.01760 [79.0]                                               | 744.7                         |
| <b>P4</b> | 47.6                                                  | 0.01446 [87.8]                                               | 611.8                         |
|           |                                                       | 0.01444 [96.5]                                               | 611.0                         |
|           |                                                       | 0.01445 [105.3]                                              | 611.4                         |
| <b>P5</b> | 34.9                                                  | 0.01505 [87.8]                                               | 636.8                         |
|           |                                                       | 0.01506 [96.5]                                               | 637.2                         |
|           |                                                       | 0.01506 [105.3]                                              | 637.2                         |

<sup>a</sup> Incident irradiance at which the transmittance starts to deviate from linear transmittance.

<sup>b</sup> TPA cross-section values obtained by excitation at 780 nm (1 GM =  $1 \times 10^{-50}$  cm<sup>4</sup> s photon<sup>-1</sup>)
